# Supplementary material
Source: HighWire-hosted journal article supplement (https://bmjopen.bmj.com/content/11/9/e046432)
Supplement: inline-supplementary-material-1 [file inline-supplementary-material-1.pdf]

## **Knowledge, Attitude and Practice of Antibiotics and their Determinants in Eritrea: Urban Population-based Survey**

Mulugeta Russom<sup>1</sup>, Merhawi Bahta<sup>1\*</sup>, Merhawi Debesai<sup>1</sup>, Iyassu Bahta<sup>1</sup>, Abrahalei Kessete<sup>1</sup>, Aziza Afendi<sup>1</sup>, Yodit Fitsum<sup>1</sup>, Josephina Nambozi<sup>2</sup>, Soliana Kidane<sup>2</sup>, Eyasu H. Tesfamariam<sup>3</sup>

<sup>1</sup>National Medicines and Food Administration, Ministry of Health, Asmara, Eritrea.

<sup>2</sup>WHO Country Office, Asmara, Eritrea.

<sup>3</sup>Biostatistics and Epidemiology Unit, Department of Statistics, College of Science, Eritrean Institute Technology, Mainefhi, Eritrea.

\*Correspondence: Merhawi Bahta, National Medicines and Food Administration, Ministry of Health, e-mail: [meramcp19@gmail.com](mailto:meramcp19@gmail.com), Tel: +291-7294279, Postal address:212, Asmara, Eritrea.

## Supplementary file 1: Number of households in the urban places of Eritrea (July 2019)

| <b>Zone</b>  | <b>City/Town</b> | <b>Number of Households</b> |
|--------------|------------------|-----------------------------|
| Gash Barka   | Akordat          | 3,822                       |
|              | Barentu          | 10,935                      |
|              | Tessenei         | 15,205                      |
|              | <b>Subtotal</b>  | <b>29,962</b>               |
| Debub        | Mendefera        | 8,023                       |
|              | Adiquala         | 3,419                       |
|              | Dekemhare        | 9,769                       |
|              | AdiKeih          | 5,335                       |
|              | Senafe           | 6,574                       |
|              | <b>Subtotal</b>  | <b>33,120</b>               |
| SKB          | Ghindae          | 5,832                       |
|              | Massawa          | 9,512                       |
|              | <b>Subtotal</b>  | <b>15,344</b>               |
| Anseba       | Keren            | 19,343                      |
|              | <b>Subtotal</b>  | <b>19,346</b>               |
| DKB          | Assab            | 3,106                       |
|              | <b>Subtotal</b>  | <b>3,106</b>                |
| Maekel       | Asmara           | 116,146                     |
|              | <b>Subtotal</b>  | <b>116,146</b>              |
| <b>Total</b> |                  | <b>217,024</b>              |

*SKB: Semienawi Keih Barhri; DKB: Debubawi Keih Barhri; HH: Household*
