# Supplementary material
Source: HighWire-hosted journal article supplement (https://bmjopen.bmj.com/content/11/9/e046432)
Supplement: inline-supplementary-material-3 [file inline-supplementary-material-3.pdf]

## **Knowledge, Attitude and Practice of Antibiotics and their Determinants in Eritrea: Urban Population-based Survey**

Mulugeta Russom<sup>1</sup>, Merhawi Bahta<sup>1\*</sup>, Merhawi Debesai<sup>1</sup>, Iyassu Bahta<sup>1</sup>, Abrahalei Kessete<sup>1</sup>, Aziza Afendi<sup>1</sup>, Yodit Fitsum<sup>1</sup>, Josephina Nambozi<sup>2</sup>, Soliana Kidane<sup>2</sup>, Eyasu H. Tesfamariam<sup>3</sup>

<sup>1</sup>National Medicines and Food Administration, Ministry of Health, Asmara, Eritrea

<sup>2</sup>WHO Country Office, Asmara, Eritrea.

<sup>3</sup>Biostatistics and Epidemiology Unit, Department of Statistics, College of Science, Eritrean Institute Technology, Mainefhi, Eritrea.

\*Correspondence: Merhawi Bahta, National Medicines and Food Administration, Ministry of Health, e-mail: meramcp19@gmail.com, Tel: +291-7294279, Postal address:212, Asmara Eritrea.

Supplementary file 3: Questionnaire on Knowledge, Attitude and Practice of Antibiotics and their Determinants in Eritrea: Urban Population-based Survey, 2019

**Part I: Identification Particulars**

|                        |  |  |  |
|------------------------|--|--|--|
| Zoba .....             |  |  |  |
| Subzoba .....          |  |  |  |
| City/Town .....        |  |  |  |
| Kebabi .....           |  |  |  |
| Respondent number..... |  |  |  |

**Interviewer Visits**

|                                                                                             | 1     | 2     | 3     | Final Visit                                                                                                                                                                                                  |  |  |  |                                                                                           |   |   |   |   |
|---------------------------------------------------------------------------------------------|-------|-------|-------|--------------------------------------------------------------------------------------------------------------------------------------------------------------------------------------------------------------|--|--|--|-------------------------------------------------------------------------------------------|---|---|---|---|
| Date                                                                                        | _____ | _____ | _____ | Day <table border="1"><tr><td></td><td></td></tr></table><br>Month <table border="1"><tr><td></td><td></td></tr></table><br>Year <table border="1"><tr><td>2</td><td>0</td><td>1</td><td>9</td></tr></table> |  |  |  |                                                                                           | 2 | 0 | 1 | 9 |
|                                                                                             |       |       |       |                                                                                                                                                                                                              |  |  |  |                                                                                           |   |   |   |   |
|                                                                                             |       |       |       |                                                                                                                                                                                                              |  |  |  |                                                                                           |   |   |   |   |
| 2                                                                                           | 0     | 1     | 9     |                                                                                                                                                                                                              |  |  |  |                                                                                           |   |   |   |   |
| Interviewer's Name                                                                          | _____ | _____ | _____ | Int. No. <table border="1"><tr><td></td><td></td></tr></table>                                                                                                                                               |  |  |  |                                                                                           |   |   |   |   |
|                                                                                             |       |       |       |                                                                                                                                                                                                              |  |  |  |                                                                                           |   |   |   |   |
| Result*                                                                                     | _____ | _____ | _____ | Result* <table border="1"><tr><td></td><td></td></tr></table>                                                                                                                                                |  |  |  |                                                                                           |   |   |   |   |
|                                                                                             |       |       |       |                                                                                                                                                                                                              |  |  |  |                                                                                           |   |   |   |   |
| Next visit: Date                                                                            | _____ | _____ |       | Total number of visits <table border="1"><tr><td></td><td></td></tr></table>                                                                                                                                 |  |  |  |                                                                                           |   |   |   |   |
|                                                                                             |       |       |       |                                                                                                                                                                                                              |  |  |  |                                                                                           |   |   |   |   |
| Time                                                                                        | _____ | _____ |       |                                                                                                                                                                                                              |  |  |  |                                                                                           |   |   |   |   |
| *Result codes:<br>Completed<br>Not completed<br>Not willing<br>Other _____ (Specify)        |       |       |       | Total persons In household <table border="1"><tr><td></td><td></td></tr></table><br>Total eligible persons (≥18) <table border="1"><tr><td></td><td></td></tr></table>                                       |  |  |  |                                                                                           |   |   |   |   |
|                                                                                             |       |       |       |                                                                                                                                                                                                              |  |  |  |                                                                                           |   |   |   |   |
|                                                                                             |       |       |       |                                                                                                                                                                                                              |  |  |  |                                                                                           |   |   |   |   |
| Supervisor<br>_____<br>Name <table border="1"><tr><td></td><td></td></tr></table><br>Number |       |       |       | Field editor<br>_____<br>Name <table border="1"><tr><td></td><td></td></tr></table><br>Number                                                                                                                |  |  |  | Keyed by<br>_____<br>Name <table border="1"><tr><td></td><td></td></tr></table><br>Number |   |   |   |   |
|                                                                                             |       |       |       |                                                                                                                                                                                                              |  |  |  |                                                                                           |   |   |   |   |
|                                                                                             |       |       |       |                                                                                                                                                                                                              |  |  |  |                                                                                           |   |   |   |   |
|                                                                                             |       |       |       |                                                                                                                                                                                                              |  |  |  |                                                                                           |   |   |   |   |

**Part II: Demographic Information**

| No. | Indicators                                         | Coding categories                                                                                                                                                                                                        | Skip |
|-----|----------------------------------------------------|--------------------------------------------------------------------------------------------------------------------------------------------------------------------------------------------------------------------------|------|
| 201 | Age (in completed years)                           | <input type="text"/> <input type="text"/>                                                                                                                                                                                |      |
| 202 | Sex                                                | Male ..... 1<br>Female ..... 2                                                                                                                                                                                           |      |
| 203 | Ethnicity                                          | Tigrina ..... 1<br>Afar ..... 2<br>Tigre ..... 3<br>Saho ..... 4<br>Rashida ..... 5<br>Kunama ..... 6<br>Blien ..... 7<br>Hidarb ..... 8<br>Nara ..... 9<br>Other (please specify) ..... 10                              |      |
| 204 | Religion                                           | Christian ..... 1<br>Muslim ..... 2<br>Other (please specify) ..... 3                                                                                                                                                    |      |
| 205 | Level of education<br>(Highest level of education) | Illiterate ..... 1<br>Primary school ..... 2<br>Middle school ..... 3<br>Secondary school ..... 4<br>Higher education ..... 5                                                                                            |      |
| 206 | Main occupation                                    | Farmer ..... 1<br>Government employee ..... 2<br>Private employee ..... 3<br>Housewife ..... 4<br>Self-employed ..... 5<br>Unemployed ..... 6<br>Student ..... 7<br>Fisher man ..... 8<br>Other (please specify) ..... 9 |      |

**Part III: Knowledge**

| No.                 | Questions                                                                                                                                                                                                                                                                                     | Coding categories                                                                                                                                                                                                                                                                                                                                                                                                                                                                                                                                                                                                                                                                                                                                                                                                                                                                                                                                                                                                                                                                                                                                                                                                                                                                                                                                                                                                                                                                                                         | Skip |   |   |    |                 |   |   |   |                    |   |   |   |               |   |   |   |           |   |   |   |                   |   |   |   |                   |   |   |   |                     |   |   |   |                  |   |   |   |  |
|---------------------|-----------------------------------------------------------------------------------------------------------------------------------------------------------------------------------------------------------------------------------------------------------------------------------------------|---------------------------------------------------------------------------------------------------------------------------------------------------------------------------------------------------------------------------------------------------------------------------------------------------------------------------------------------------------------------------------------------------------------------------------------------------------------------------------------------------------------------------------------------------------------------------------------------------------------------------------------------------------------------------------------------------------------------------------------------------------------------------------------------------------------------------------------------------------------------------------------------------------------------------------------------------------------------------------------------------------------------------------------------------------------------------------------------------------------------------------------------------------------------------------------------------------------------------------------------------------------------------------------------------------------------------------------------------------------------------------------------------------------------------------------------------------------------------------------------------------------------------|------|---|---|----|-----------------|---|---|---|--------------------|---|---|---|---------------|---|---|---|-----------|---|---|---|-------------------|---|---|---|-------------------|---|---|---|---------------------|---|---|---|------------------|---|---|---|--|
| 301                 | Have you ever heard about antibiotics?                                                                                                                                                                                                                                                        | Yes ..... 1<br>No ..... 2                                                                                                                                                                                                                                                                                                                                                                                                                                                                                                                                                                                                                                                                                                                                                                                                                                                                                                                                                                                                                                                                                                                                                                                                                                                                                                                                                                                                                                                                                                 | 303  |   |   |    |                 |   |   |   |                    |   |   |   |               |   |   |   |           |   |   |   |                   |   |   |   |                   |   |   |   |                     |   |   |   |                  |   |   |   |  |
| 302                 | Have you ever heard of any one of the following medications?<br>ASK FOR EACH MEDICATION.                                                                                                                                                                                                      | Amoxicillin ..... A<br>Tetracycline ..... B<br>Oxytetracycline ..... C<br>I haven't heard all of them ..... D                                                                                                                                                                                                                                                                                                                                                                                                                                                                                                                                                                                                                                                                                                                                                                                                                                                                                                                                                                                                                                                                                                                                                                                                                                                                                                                                                                                                             | END  |   |   |    |                 |   |   |   |                    |   |   |   |               |   |   |   |           |   |   |   |                   |   |   |   |                   |   |   |   |                     |   |   |   |                  |   |   |   |  |
| 303                 | Which of the following do you think are antibiotics?<br>ASK FOR EACH MEDICATION.<br><i>If the response in Q301 is No and heard of any one of the examples of antibiotics, explain, after completing Q303 and before continuing to Q304, that the term 'Antibiotics' refers to such drugs.</i> | <table style="width: 100%; border-collapse: collapse;"> <thead> <tr> <th></th> <th style="text-align: center;">Y</th> <th style="text-align: center;">N</th> <th style="text-align: center;">DK</th> </tr> </thead> <tbody> <tr> <td>Ibuprofen .....</td> <td style="text-align: center;">1</td> <td style="text-align: center;">2</td> <td style="text-align: center;">3</td> </tr> <tr> <td>Tetracycline .....</td> <td style="text-align: center;">1</td> <td style="text-align: center;">2</td> <td style="text-align: center;">3</td> </tr> <tr> <td>Bactrim .....</td> <td style="text-align: center;">1</td> <td style="text-align: center;">2</td> <td style="text-align: center;">3</td> </tr> <tr> <td>ORS .....</td> <td style="text-align: center;">1</td> <td style="text-align: center;">2</td> <td style="text-align: center;">3</td> </tr> <tr> <td>Amoxicillin .....</td> <td style="text-align: center;">1</td> <td style="text-align: center;">2</td> <td style="text-align: center;">3</td> </tr> <tr> <td>Paracetamol .....</td> <td style="text-align: center;">1</td> <td style="text-align: center;">2</td> <td style="text-align: center;">3</td> </tr> <tr> <td>Ciprofloxacin .....</td> <td style="text-align: center;">1</td> <td style="text-align: center;">2</td> <td style="text-align: center;">3</td> </tr> <tr> <td>Penicillin .....</td> <td style="text-align: center;">1</td> <td style="text-align: center;">2</td> <td style="text-align: center;">3</td> </tr> </tbody> </table> |      | Y | N | DK | Ibuprofen ..... | 1 | 2 | 3 | Tetracycline ..... | 1 | 2 | 3 | Bactrim ..... | 1 | 2 | 3 | ORS ..... | 1 | 2 | 3 | Amoxicillin ..... | 1 | 2 | 3 | Paracetamol ..... | 1 | 2 | 3 | Ciprofloxacin ..... | 1 | 2 | 3 | Penicillin ..... | 1 | 2 | 3 |  |
|                     | Y                                                                                                                                                                                                                                                                                             | N                                                                                                                                                                                                                                                                                                                                                                                                                                                                                                                                                                                                                                                                                                                                                                                                                                                                                                                                                                                                                                                                                                                                                                                                                                                                                                                                                                                                                                                                                                                         | DK   |   |   |    |                 |   |   |   |                    |   |   |   |               |   |   |   |           |   |   |   |                   |   |   |   |                   |   |   |   |                     |   |   |   |                  |   |   |   |  |
| Ibuprofen .....     | 1                                                                                                                                                                                                                                                                                             | 2                                                                                                                                                                                                                                                                                                                                                                                                                                                                                                                                                                                                                                                                                                                                                                                                                                                                                                                                                                                                                                                                                                                                                                                                                                                                                                                                                                                                                                                                                                                         | 3    |   |   |    |                 |   |   |   |                    |   |   |   |               |   |   |   |           |   |   |   |                   |   |   |   |                   |   |   |   |                     |   |   |   |                  |   |   |   |  |
| Tetracycline .....  | 1                                                                                                                                                                                                                                                                                             | 2                                                                                                                                                                                                                                                                                                                                                                                                                                                                                                                                                                                                                                                                                                                                                                                                                                                                                                                                                                                                                                                                                                                                                                                                                                                                                                                                                                                                                                                                                                                         | 3    |   |   |    |                 |   |   |   |                    |   |   |   |               |   |   |   |           |   |   |   |                   |   |   |   |                   |   |   |   |                     |   |   |   |                  |   |   |   |  |
| Bactrim .....       | 1                                                                                                                                                                                                                                                                                             | 2                                                                                                                                                                                                                                                                                                                                                                                                                                                                                                                                                                                                                                                                                                                                                                                                                                                                                                                                                                                                                                                                                                                                                                                                                                                                                                                                                                                                                                                                                                                         | 3    |   |   |    |                 |   |   |   |                    |   |   |   |               |   |   |   |           |   |   |   |                   |   |   |   |                   |   |   |   |                     |   |   |   |                  |   |   |   |  |
| ORS .....           | 1                                                                                                                                                                                                                                                                                             | 2                                                                                                                                                                                                                                                                                                                                                                                                                                                                                                                                                                                                                                                                                                                                                                                                                                                                                                                                                                                                                                                                                                                                                                                                                                                                                                                                                                                                                                                                                                                         | 3    |   |   |    |                 |   |   |   |                    |   |   |   |               |   |   |   |           |   |   |   |                   |   |   |   |                   |   |   |   |                     |   |   |   |                  |   |   |   |  |
| Amoxicillin .....   | 1                                                                                                                                                                                                                                                                                             | 2                                                                                                                                                                                                                                                                                                                                                                                                                                                                                                                                                                                                                                                                                                                                                                                                                                                                                                                                                                                                                                                                                                                                                                                                                                                                                                                                                                                                                                                                                                                         | 3    |   |   |    |                 |   |   |   |                    |   |   |   |               |   |   |   |           |   |   |   |                   |   |   |   |                   |   |   |   |                     |   |   |   |                  |   |   |   |  |
| Paracetamol .....   | 1                                                                                                                                                                                                                                                                                             | 2                                                                                                                                                                                                                                                                                                                                                                                                                                                                                                                                                                                                                                                                                                                                                                                                                                                                                                                                                                                                                                                                                                                                                                                                                                                                                                                                                                                                                                                                                                                         | 3    |   |   |    |                 |   |   |   |                    |   |   |   |               |   |   |   |           |   |   |   |                   |   |   |   |                   |   |   |   |                     |   |   |   |                  |   |   |   |  |
| Ciprofloxacin ..... | 1                                                                                                                                                                                                                                                                                             | 2                                                                                                                                                                                                                                                                                                                                                                                                                                                                                                                                                                                                                                                                                                                                                                                                                                                                                                                                                                                                                                                                                                                                                                                                                                                                                                                                                                                                                                                                                                                         | 3    |   |   |    |                 |   |   |   |                    |   |   |   |               |   |   |   |           |   |   |   |                   |   |   |   |                   |   |   |   |                     |   |   |   |                  |   |   |   |  |
| Penicillin .....    | 1                                                                                                                                                                                                                                                                                             | 2                                                                                                                                                                                                                                                                                                                                                                                                                                                                                                                                                                                                                                                                                                                                                                                                                                                                                                                                                                                                                                                                                                                                                                                                                                                                                                                                                                                                                                                                                                                         | 3    |   |   |    |                 |   |   |   |                    |   |   |   |               |   |   |   |           |   |   |   |                   |   |   |   |                   |   |   |   |                     |   |   |   |                  |   |   |   |  |
| 304                 | Which of these diseases do you think are treated with antibiotics?<br><br>ASK FOR EACH ILLNESS.                                                                                                                                                                                               | Common cold ..... 1 2 3<br>Watery diarrhea ..... 1 2 3<br>TB ... ..... 1 2 3<br>Dengue fever ..... 1 2 3<br>Pneumonia ..... 1 2 3<br>Dry cough ..... 1 2 3                                                                                                                                                                                                                                                                                                                                                                                                                                                                                                                                                                                                                                                                                                                                                                                                                                                                                                                                                                                                                                                                                                                                                                                                                                                                                                                                                                |      |   |   |    |                 |   |   |   |                    |   |   |   |               |   |   |   |           |   |   |   |                   |   |   |   |                   |   |   |   |                     |   |   |   |                  |   |   |   |  |
| 305                 | Do antibiotics treat viral infections?                                                                                                                                                                                                                                                        | Yes ..... 1<br>No ..... 2<br>Don't know ..... 3                                                                                                                                                                                                                                                                                                                                                                                                                                                                                                                                                                                                                                                                                                                                                                                                                                                                                                                                                                                                                                                                                                                                                                                                                                                                                                                                                                                                                                                                           |      |   |   |    |                 |   |   |   |                    |   |   |   |               |   |   |   |           |   |   |   |                   |   |   |   |                   |   |   |   |                     |   |   |   |                  |   |   |   |  |
| 306                 | When do you think you should stop taking antibiotics once you've begun treatment?<br><br>MULTIPLE RESPONSES ARE POSSIBLE.<br>PROBE: Are there any other reasons                                                                                                                               | When I feel better ..... A<br>When I do not see improvements ..... B<br>When I encounter adverse drug reactions ..... C<br>It should not be stopped ..... D<br>Don't know ..... E                                                                                                                                                                                                                                                                                                                                                                                                                                                                                                                                                                                                                                                                                                                                                                                                                                                                                                                                                                                                                                                                                                                                                                                                                                                                                                                                         |      |   |   |    |                 |   |   |   |                    |   |   |   |               |   |   |   |           |   |   |   |                   |   |   |   |                   |   |   |   |                     |   |   |   |                  |   |   |   |  |
| 307                 | Have you ever heard of the term antibiotic resistance (ABR)?                                                                                                                                                                                                                                  | Yes ..... 1<br>No ..... 2                                                                                                                                                                                                                                                                                                                                                                                                                                                                                                                                                                                                                                                                                                                                                                                                                                                                                                                                                                                                                                                                                                                                                                                                                                                                                                                                                                                                                                                                                                 |      |   |   |    |                 |   |   |   |                    |   |   |   |               |   |   |   |           |   |   |   |                   |   |   |   |                   |   |   |   |                     |   |   |   |                  |   |   |   |  |
| 308                 | Antibiotic resistance occurs when your becomes resistant to antibiotics and they no work.                                                                                                                                                                                                     | Yes ..... 1<br>No ..... 2<br>Don't know ..... 3                                                                                                                                                                                                                                                                                                                                                                                                                                                                                                                                                                                                                                                                                                                                                                                                                                                                                                                                                                                                                                                                                                                                                                                                                                                                                                                                                                                                                                                                           | 404  |   |   |    |                 |   |   |   |                    |   |   |   |               |   |   |   |           |   |   |   |                   |   |   |   |                   |   |   |   |                     |   |   |   |                  |   |   |   |  |
| 309                 | Where did you hear about antibiotic resistant<br><br>MULTIPLE RESPONSES ARE POSSIBLE.<br><br>PROBE: Are there any other sources                                                                                                                                                               | Health facility ..... A<br>Pharmacy ..... B<br>Radio ..... C<br>TV ..... D<br>Newspaper ..... E<br>Campaign/Seminar ..... F<br>Other (please specify) ..... G                                                                                                                                                                                                                                                                                                                                                                                                                                                                                                                                                                                                                                                                                                                                                                                                                                                                                                                                                                                                                                                                                                                                                                                                                                                                                                                                                             |      |   |   |    |                 |   |   |   |                    |   |   |   |               |   |   |   |           |   |   |   |                   |   |   |   |                   |   |   |   |                     |   |   |   |                  |   |   |   |  |

|     |                                                                               |                                                 |  |
|-----|-------------------------------------------------------------------------------|-------------------------------------------------|--|
| 310 | Antibiotic resistance is an issue that could affect me or my family.          | Yes ..... 1<br>No ..... 2<br>Don't know ..... 3 |  |
| 311 | Antibiotic resistance is an issue in other countries but not here.            | Yes ..... 1<br>No ..... 2<br>Don't know ..... 3 |  |
| 312 | Bacteria which are resistant to antibiotics can spread from person to person. | Yes ..... 1<br>No ..... 2<br>Don't know ..... 3 |  |

**Part IV: Attitude**

| No. | Questions                                                                          |                                                                                                             | Skip |
|-----|------------------------------------------------------------------------------------|-------------------------------------------------------------------------------------------------------------|------|
| 401 | Proper handwashing play a role in ABR.                                             | Strongly disagree ..... 1<br>Disagree ..... 2<br>Neutral ..... 3<br>Agree ..... 4<br>Strongly agree ..... 5 |      |
| 402 | Taking antibiotics when it is not required can facilitate ABR.                     | Strongly disagree ..... 1<br>Disagree ..... 2<br>Neutral ..... 3<br>Agree ..... 4<br>Strongly agree ..... 5 |      |
| 403 | You have a role to fight ABR                                                       | Strongly disagree ..... 1<br>Disagree ..... 2<br>Neutral ..... 3<br>Agree ..... 4<br>Strongly agree ..... 5 |      |
| 404 | We can use antibiotics without prescription                                        | Strongly disagree ..... 1<br>Disagree ..... 2<br>Neutral ..... 3<br>Agree ..... 4<br>Strongly agree ..... 5 |      |
| 405 | It is okay to share antibiotics with family members or friends for similar illness | Strongly disagree ..... 1<br>Disagree ..... 2<br>Neutral ..... 3<br>Agree ..... 4<br>Strongly agree ..... 5 |      |
| 406 | It is okay to keep leftover antibiotics and use them later                         | Strongly disagree ..... 1<br>Disagree ..... 2<br>Neutral ..... 3<br>Agree ..... 4<br>Strongly agree ..... 5 |      |

|     |                                                              |                                                                                                                                 |  |
|-----|--------------------------------------------------------------|---------------------------------------------------------------------------------------------------------------------------------|--|
| 407 | Farmers can give antibiotic without consulting veterinarian  | Strongly disagree . . . . . 1<br>Disagree . . . . . 2<br>Neutral . . . . . 3<br>Agree . . . . . 4<br>Strongly agree . . . . . 5 |  |
| 408 | Leftover antibiotics should be disposed with regular garbage | Strongly disagree . . . . . 1<br>Disagree . . . . . 2<br>Neutral . . . . . 3<br>Agree . . . . . 4<br>Strongly agree . . . . . 5 |  |
| 409 | Leftover antibiotics should be disposed at toilets           | Strongly disagree . . . . . 1<br>Disagree . . . . . 2<br>Neutral . . . . . 3<br>Agree . . . . . 4<br>Strongly agree . . . . . 5 |  |

**Part V: Practice**

| No. | Questions                                                                                                   | Coding categories                                                                                                                                                                                                                                                                | Skip |
|-----|-------------------------------------------------------------------------------------------------------------|----------------------------------------------------------------------------------------------------------------------------------------------------------------------------------------------------------------------------------------------------------------------------------|------|
| 501 | Have you ever used antibiotics?                                                                             | Yes . . . . . 1<br>No . . . . . 2<br>Don't remember . . . . . 3                                                                                                                                                                                                                  | 509  |
| 502 | When was the last time you took antibiotics?                                                                | Now . . . . . 1<br>Last month . . . . . 2<br>Last six months . . . . . 3<br>Last year . . . . . 4<br>More than a year ago . . . . . 5<br>Don't remember . . . . . 6                                                                                                              |      |
| 503 | Source of the last course of antibiotic<br><br>MULTIPLE RESPONSES ARE POSSIBLE.                             | Health facility . . . . . A<br>Drug retail outlet . . . . . B<br>Friend or family member . . . . . C<br>Saved up from a previous time . . . . . D<br>From abroad . . . . . E<br>Don't remember . . . . . F                                                                       |      |
| 504 | On that occasion, did you get a prescription for the antibiotics from a doctor/nurse?                       | Yes . . . . . 1<br>Don't remember . . . . . 2<br>No . . . . . 3                                                                                                                                                                                                                  | 506  |
| 505 | What was (were) your reason(s) of self-medication with antibiotics?<br><br>MULTIPLE RESPONSES ARE POSSIBLE. | Long queue . . . . . A<br>Had no time to visit a health facility . . . . . B<br>To get a quick relief . . . . . C<br>Disease was not serious . . . . . D<br>To save expenses . . . . . E<br>Own previous successful experience . . . . . F<br>Other (please specify) . . . . . G |      |

|     |                                                                                            |                                                                                                                                                                                                                                                                          |     |
|-----|--------------------------------------------------------------------------------------------|--------------------------------------------------------------------------------------------------------------------------------------------------------------------------------------------------------------------------------------------------------------------------|-----|
| 506 | Did you ever stop taking antibiotics before completing the full course?                    | Yes ..... 1<br>No ..... 2<br>Don't remember ..... 3                                                                                                                                                                                                                      | 508 |
| 507 | Why did you stop taking the antibiotics?                                                   | Condition didn't improve ..... 1<br>Condition improved ..... 2<br>Due to adverse effects ..... 3<br>Advised by a friend or family member ..... 4<br>I didn't think it works ..... 5<br>Told to stop by a healthcare profession ..... 6<br>Other (please specify) ..... 7 |     |
| 508 | Ever used antibiotics on your own, though health care professionals advise you not to take | Yes ..... 1<br>No ..... 2<br>Don't remember ..... 3                                                                                                                                                                                                                      |     |
| 509 | Have you ever given antibiotics to your animals?                                           | Yes ..... 1<br>No ..... 2<br>Don't remember ..... 3<br>Don't have an animal ..... 4                                                                                                                                                                                      | END |
| 510 | Which antibiotic did you use for your animal?<br>ASK FOR EACH MEDICATION.                  | Amoxicillin ..... A<br>Erythromycin ..... B<br>Oxytetracycline ..... C<br>Penicillin ..... D<br>Tylosin ..... E<br>Didn't use all of these antibiotics ..... F<br>Other (please specify) ..... G                                                                         |     |
| 511 | Source of the antibiotics                                                                  | Bought from the market ..... A<br>Bought from Drug retail outlet ..... B<br>Veterenarian ..... C<br>Friends/family membe ..... D<br>Other (please specify) ..... E                                                                                                       |     |
| 512 | How many times did you buy antibiotics for your animal in the last one year ?              | Once ..... 1<br>Twice ..... 2<br>Three times ..... 3<br>More than three times ..... 4<br>Never ..... 5                                                                                                                                                                   |     |

Y: Yes; N;No; DK: Don't Know

END OF INTERVIEW

**INTERVIEWER'S OBSERVATIONS**

TO BE FILLED IN AFTER COMPLETING THE INTERVIEW

COMMENTS ABOUT THE INTERVIEW

COMMENTS ON SPECIFIC QUESTIONS

ANY OTHER COMMENTS

SUPERVISOR'S OBSERVATIONS

EDITOR'S OBSERVATIONS
